# Supplementary material
Source: PubMed Central journal article supplement (PMC9941975)
Supplement: jamapediatr-e225975-s002.pdf [file jamapediatr-e225975-s002.pdf]

## Data Sharing Statement

Wieckowski. Sensitivity and Specificity of the Modified Checklist for Autism in Toddlers (Original and Revised). *JAMA Pediatr.* Published February 20, 2023.  
doi:10.1001/jamapediatrics.2022.5975

### Data

**Data available:** No

### Additional Information

**Explanation for why data not available:** This is a systematic review and meta-analysis and therefore we do not have access to raw data and only use data reported in other publications.
